# Supplementary material for: Mouse Embryonic Stem Cell-Derived Ureteric Bud Progenitors Induce Nephrogenesis
Source: PubMed Central journal article supplement (PMC7072223; doi:10.3390/cells9020329), 2020-01-31

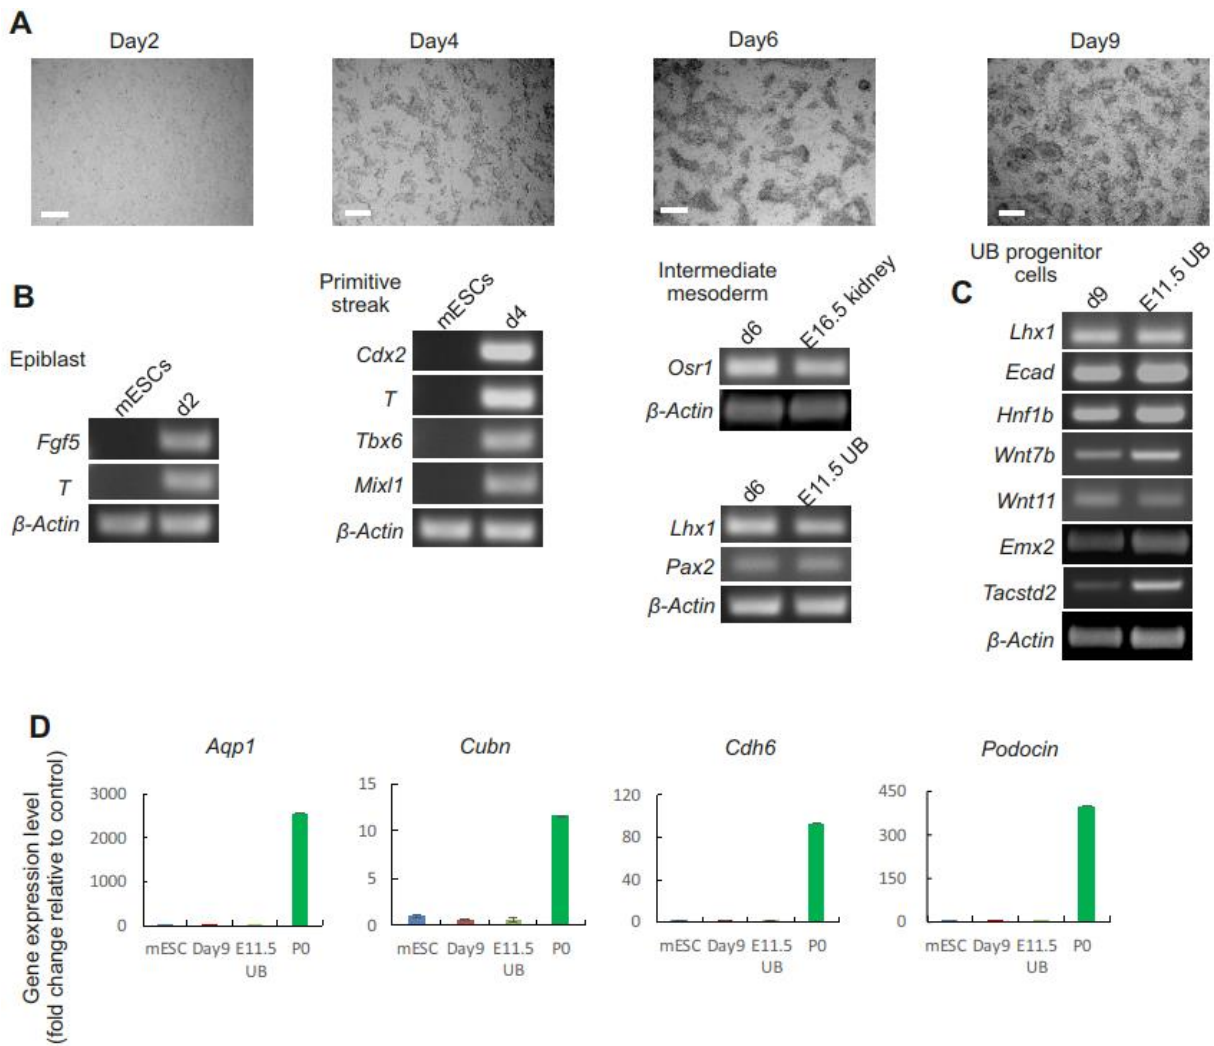

**Figure S1: Differentiation of mESCs into ureteric bud progenitor cells.** (A) Brightfield images of mESCs in monolayer (2D) cultures during differentiation into UB progenitor cells. Consecutive days are shown. Scale bars, 200  $\mu$ m. (B) RT-PCR displays mESC differentiation into epiblasts but not to extraembryonic endoderm at day 2, primitive streak but no ectoderm at day 4 and intermediate mesoderm but no ectoderm).  $\beta$ -actin was used as a housekeeping gene, E16.5 kidney, E11.5 UB and mESC were used as a control. Cell-specific markers: *Afp*, extraembryonic endoderm; *Pax6*, ectoderm; coexpression of *Pax6* and *Sox1*, ectoderm. (C) RT-PCR at day 9 of differentiation showing the expression of markers of UB progenitors while ectodermal marker *Pax6* was not detected; E11.5 UB was used as positive control. (D) qPCR graphs show lack of nephron specific marker expression in day 9 differentiated cells.

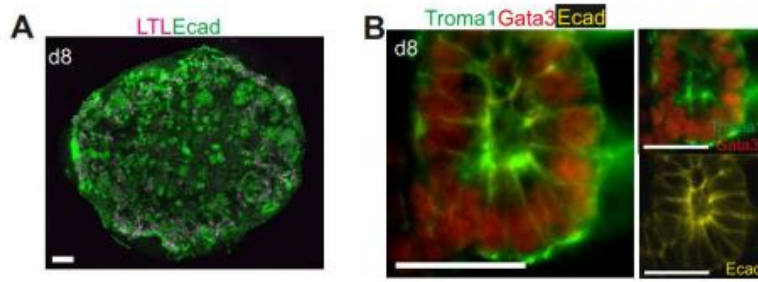

**Figure S2: Differentiated mESCs induce embryonic MM to nephrogenesis.** (A) Tile scan immunofluorescence of a whole kidney organoid displaying complexity of tubular structures. The proximal tubules marked with LTL (magenta), nephron tubules and collecting ducts labelled with Ecad (green). Scale bar, 200  $\mu\text{m}$ . (B) Confocal images of collecting duct structure. Scale bare 20  $\mu\text{m}$ .

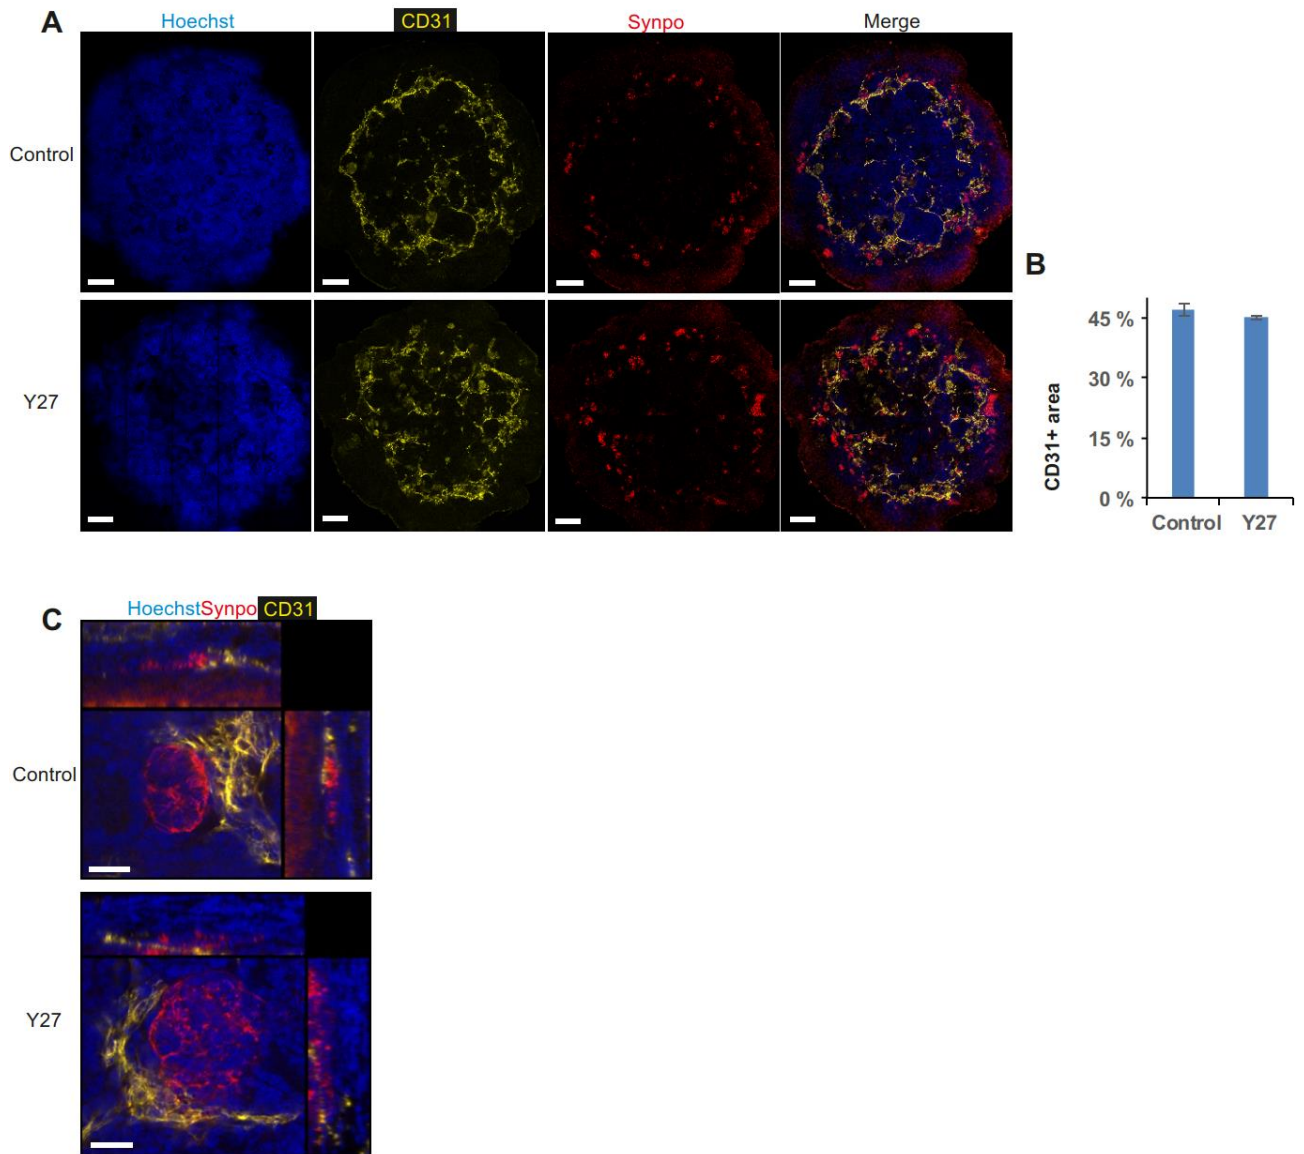

**Figure S3: Vascularization of the kidney organoids.** (A) Tile scan immunofluorescence of the whole kidney organoids displaying vascularization network treated with Rock inhibitor (Y27) or without (Control). Stains: Hoechst, DNA; glomeruli, Synpo, endothelial cells, CD31. Scale bars, 200  $\mu\text{m}$ . (B) Percentage of the total culture area occupied by cells expressing CD31,  $n=6$  experiments ( $\pm$  S.E.M.). (C) Confocal multiple image projection (MIP) showing glomeruli with endothelial cells in organoids treated with Y27 or without treatment (control). Scale bars, 20  $\mu\text{m}$ .

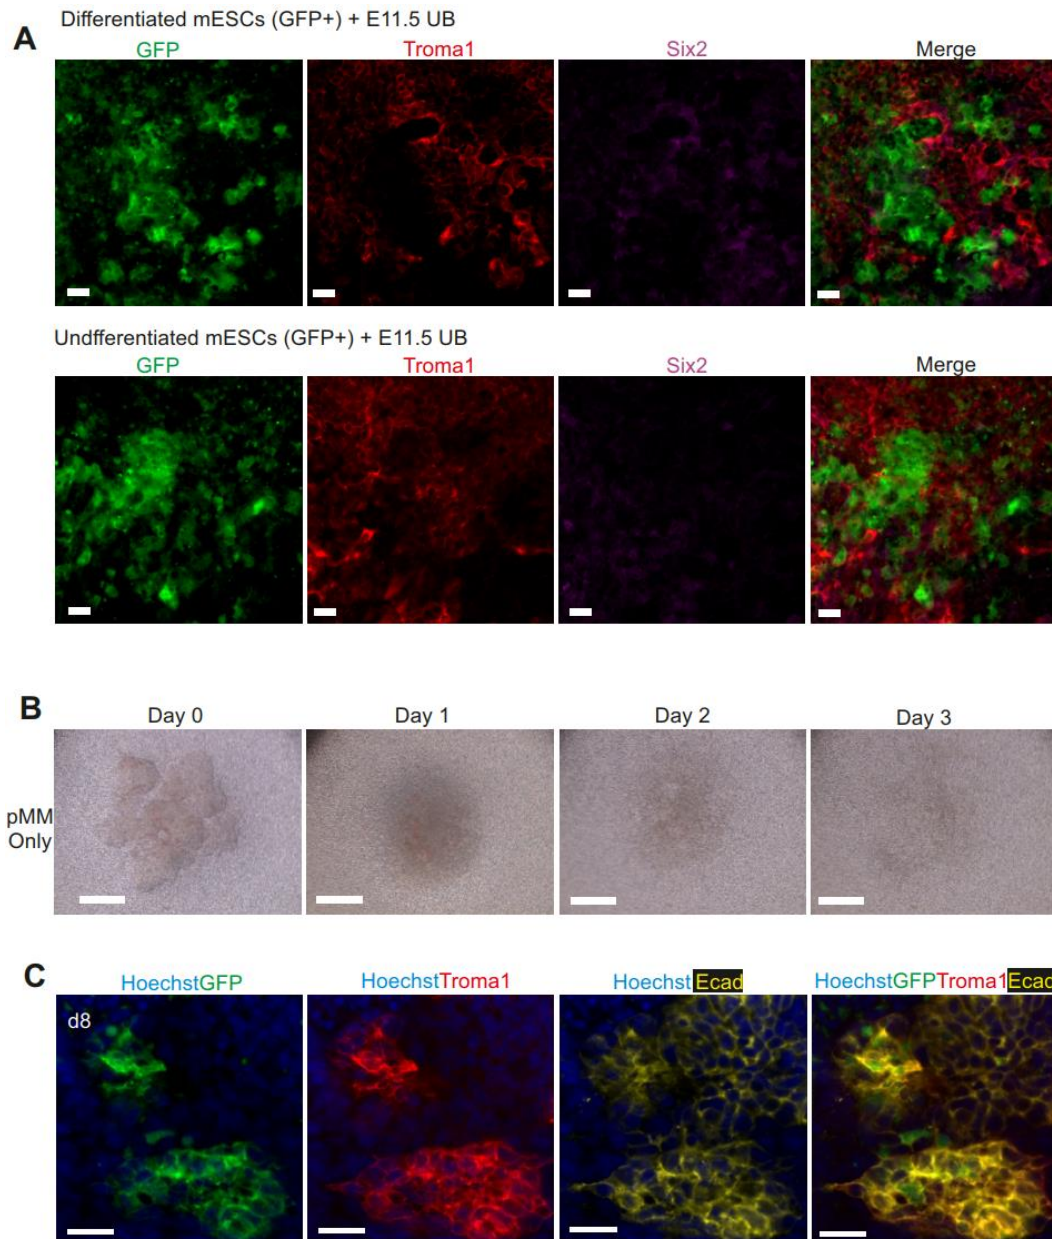

**Figure S4: Characterization of kidney organoids.** (A) Confocal images showed no visible signs of *in vitro* nephrogenesis at day 3 of culture when dissected mouse embryonic ureteric bud (UB) cells were co-cultured with differentiated or undifferentiated GFP+ mESCs. Lack of nephron progenitors leads to lack of nephrogenesis. Collecting duct labelled with Troma1 (red), mESC-derived UB cells (GFP, upper panel) and undifferentiated mESCs (GFP, lower panel), nephron progenitors marked with Six2 (purple). Scale bars, 20  $\mu$ m. (B) Primary MM (pMM) cultured alone on a 3D Trowell culture died after 3 days (n=3). Scale bars, 500  $\mu$ m. (C) Immunostaining of Troma1+Ecad+ chimeric collecting ducts generated by GFP+ mESCs-derived UB progenitors and pUB in chimeric kidney organoids. Scale bars, 20  $\mu$ m.

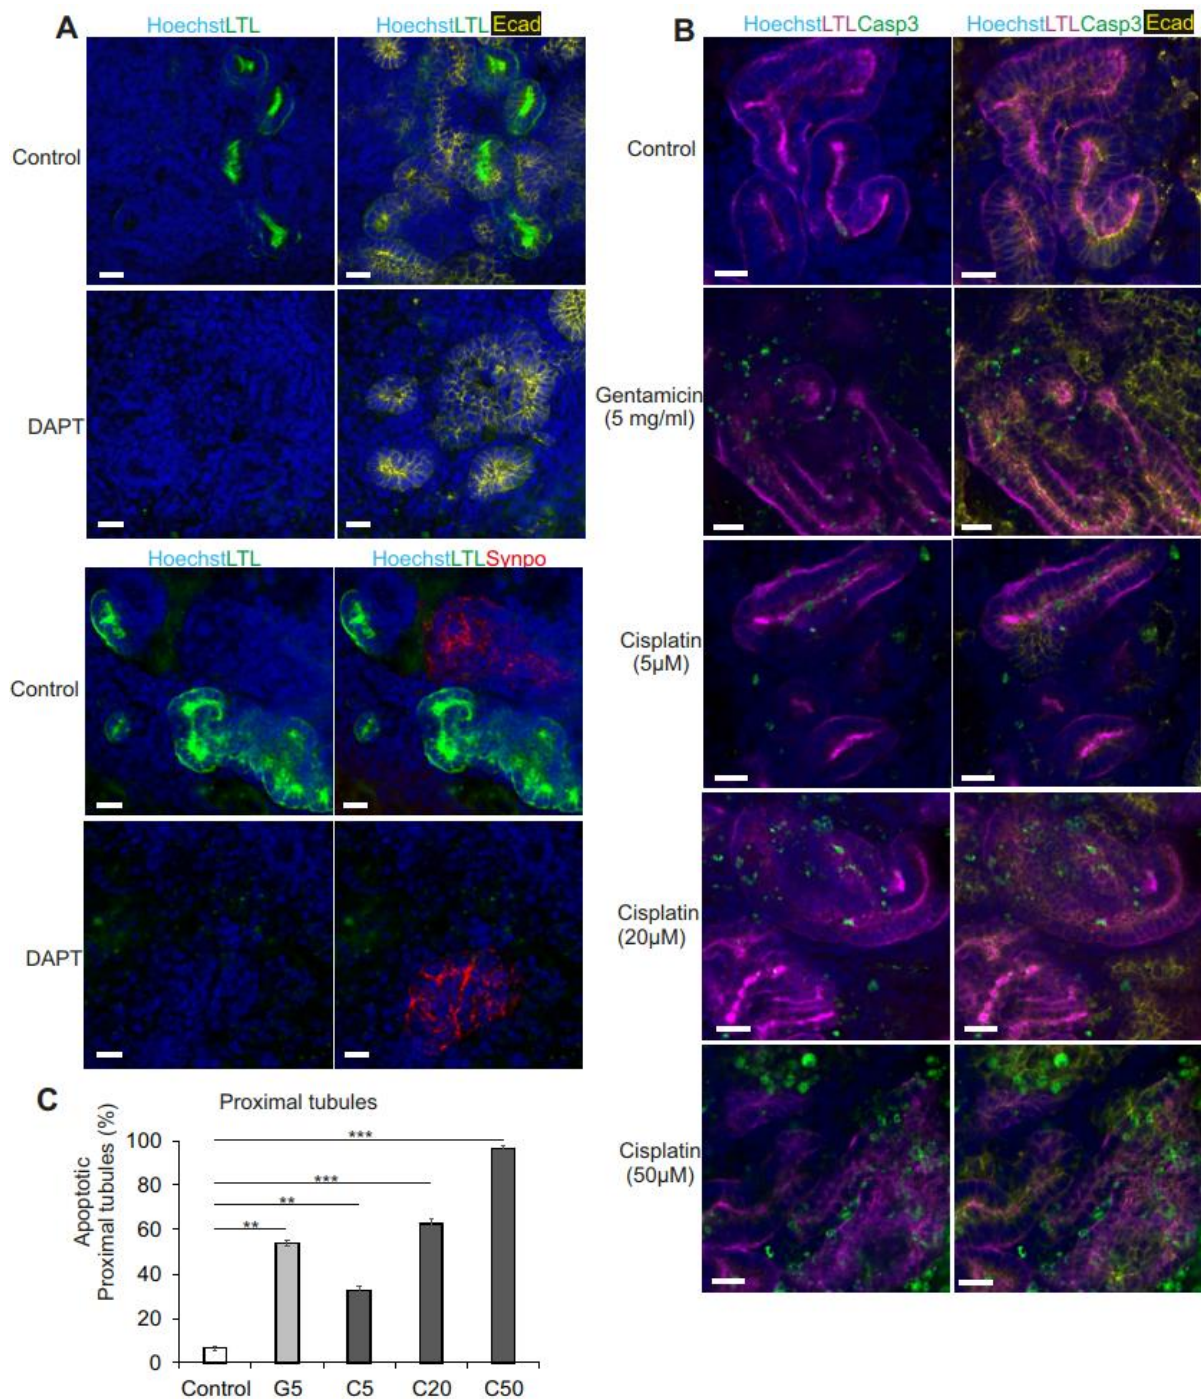

**Figure S5: Kidney organoids model kidney development and injury.** (A) Representative images of immunohistochemistry of a kidney organoid showing lack of proximal tubule structures when treated with 10  $\mu$ M DAPT from day 3 to 11. Notch inhibition suppressed the proximal tubule (LTL+, green) formation, but the UB (Ecad+, yellow) and glomerular (Synpo+, red) structures developed normally.  $n = 5$ ; Scale bars, 20  $\mu$ m. (B) Representative immunohistochemistry images of renal structures treated with gentamicin (5 mg/ml) from day 9 to 11 (48 hours) or cisplatin (5, 20, 50  $\mu$ M) from day 10 to 11 (24 hours). Apoptotic cells were detected by cleaved caspase 3 antibody-staining (Casp3).  $n = 6$ ; Scale bars, 20  $\mu$ m. (C) Quantification of number of apoptotic proximal tubular cells in kidney organoids treated with gentamicin (G) (5 mg/ml) and cisplatin (C) (5, 20, 50  $\mu$ M) at indicated doses. Data are expressed as mean  $\pm$  s.e.m. ( $n=5$ ); \*\* -  $p<0.01$ ; \*\*\* -  $p<0.001$ .

**Table S1: Primers (5'-3') used in the study.**

| Gene name      | Forward primer sequence  | Reverse primer sequence   |
|----------------|--------------------------|---------------------------|
| <i>β-Actin</i> | GATCTGGCACCACACCTTCT     | GGGGTGTGAAGGTCTCAA        |
| <i>GADPH</i>   | CATCAGTCCTTCCACGATACCA   | CCTGCACCACCAACTGCTTA      |
| <i>Fgf5</i>    | GCTGTGTCTCAGGGGATTGT     | CACTCTCGGCCTGTCTTTTC      |
| <i>T</i>       | GCTTCAAGGAGCTAACTAACGAG  | CCAGCAAGAAAGAGTACATGGC    |
| <i>Mixl1</i>   | ACGCAGTGCTTTCCAAACC      | CCCGCAAGTGGATGTCTGG       |
| <i>Tbx6</i>    | ATGTACCATCCACGAGAGTTGT   | GGTAGCGGTAACCCTCTGTC      |
| <i>Cdx2</i>    | AGCTGCTGTAGGCGGAATGTATG  | TCAGTGACTCGAACAGCAGCAA    |
| <i>Osr1</i>    | GAGCGACCTTACACCTGTGA     | GTCTTGTGGACAGCGAGAGT      |
| <i>Lhx1</i>    | CAGTGTCGCCAAAGAGAACA     | TGAGACGTTGGCACTTTTCAG     |
| <i>Hoxb7</i>   | GACTTGGCGGCCGAGAGTAA     | CCGAGTCAGGTAGCGATTGTAGTG  |
| <i>Emx2</i>    | GATATCTGGGTCATCGCTTCCAA  | GCTCCCACCACGTAATGGTTC     |
| <i>Wnt11</i>   | TGTGCGGACAACCTCAGCTAC    | ATGGCATTACACTTCGTTTCCAG   |
| <i>Sox9</i>    | AGGAAGCTGGCAGACCAGTA     | TCCACGAAGGGTCTCTTCTC      |
| <i>Ecad</i>    | CACCGATGGTGAGGGTACACAG   | GGCTTCAGGAATACATGGACAAAGA |
| <i>Hnf1b</i>   | CGCGGTGACTCAGCTACAGAAC   | TCACCAGGCTTGCAGTGGAC      |
| <i>Wnt7b</i>   | TACCTAAGTTCCGCGAGGGTG    | AGGCTTCTGGTAGCTGCGTA      |
| <i>Tacstd2</i> | ACTGTACATGCCCCACCAAC     | GCAGGCACTTGAAGTTAGC       |
| <i>Pax2</i>    | CGCCGTTTCTGTGACACACAATC  | TGCTTGGGACCAAACACAAGGTG   |
| <i>Ret</i>     | TTCTGAAGACAGGCCACAGGA    | CACTGGCCTCTTGTCTGGCT      |
| <i>Wnt9b</i>   | TGGCTTTCGTGAGCATGGAG     | AAAGACAGCCACGGTGTGGTAA    |
| <i>Calb1</i>   | CCTTTGTGGATCAATATGGACAGA | TCAGTTGCTGGCATCGAAAG      |
| <i>Aqp1</i>    | AGGCTTCAATTACCCACTGGA    | GTGAGCACCGCTGATGTGA       |
| <i>Cubn</i>    | CACTTTAGGTTGTGGTGGAACA   | TTGCTGTCAAAGCTAATCTCCC    |
| <i>Cdh6</i>    | CAGCCCTACCCAACCTTCTCA    | GAACGGCTCAGCTCATTCC       |
| <i>Podocin</i> | GACCAGAGGAAGGCATCAAGC    | GCACAACCTTTATGCAGAACCAG   |

**Table S2: Summary of available protocols of differentiation of mouse and human PSC to UB lineages.**

|                                             |                                                      | Our protocol                                         | Taguchi et al., 2017                       | Taguchi et al., 2017                        | Takasato et al., 2015                                | Xia et al., 2013 | Mae et al., 2018 |
|---------------------------------------------|------------------------------------------------------|------------------------------------------------------|--------------------------------------------|---------------------------------------------|------------------------------------------------------|------------------|------------------|
| Cell type                                   |                                                      | mESC                                                 | mESC                                       | hiPSC                                       | hESC/<br>hiPSC                                       | hESC/<br>hiPSC   | hESC/<br>hiPSC   |
| Differentiation condition                   | Basic differentiation medium                         | Advance RPMI 1640                                    | IMDM/F12                                   | IMDM/F12                                    | APEL                                                 | DMEM/F12         | Essential 6      |
|                                             | Specific factors (PSC differentiated to IM)          | Activin A                                            | Activin A                                  | Activin A                                   | CHIR99021                                            | Activin A        | Activin A        |
|                                             |                                                      | FGF2                                                 | BMP4                                       | BMP4                                        | FGF9                                                 | FGF2             | BMP4             |
|                                             |                                                      | CHIR99021                                            | CHIR99021                                  | CHIR99021                                   |                                                      | Retinoic Acid    | CHIR99021        |
|                                             |                                                      | Noggin                                               | Retinoic Acid                              | Retinoic Acid                               |                                                      | BMP4             | LDN193189        |
|                                             |                                                      |                                                      | FGF9                                       | FGF9                                        |                                                      | BMP2             | A83-01           |
|                                             |                                                      |                                                      | SB431542                                   | LDN193189                                   |                                                      |                  | FGF8             |
|                                             | Specific factors (IM differentiated to UB)           |                                                      |                                            | SB431542                                    |                                                      |                  | TTNPB            |
|                                             |                                                      | FGF9                                                 | Retinoic Acid                              | Retinoic Acid                               | CHIR99021                                            |                  | CHIR99021        |
|                                             |                                                      |                                                      | CHIR99021                                  | CHIR99021                                   | FGF9                                                 |                  | LDN193189        |
|                                             |                                                      |                                                      | FGF9                                       | FGF9                                        |                                                      |                  | FGF8             |
|                                             |                                                      |                                                      | Y27632                                     | Y27632                                      |                                                      |                  | GDNF             |
|                                             |                                                      |                                                      | GDNF                                       | GDNF                                        |                                                      |                  | FGF1             |
|                                             | FACS sorting step                                    | no                                                   | yes, FACS sorting of the Cxcr4+/Kit+ cells | yes, FACS sorting of the CXCR4+/KI T+ cells | no                                                   | no               | no               |
| Generation of UB de novo                    | yes                                                  | yes                                                  | yes                                        | yes                                         | no                                                   | yes              |                  |
| Collecting duct connect with nephron tubule | yes                                                  | yes                                                  | not shown                                  | yes                                         | not shown                                            | not shown        |                  |
| Source of MM (aggregate to form organoid)   | E11.5 MM                                             | mESC-derived NPC+E11.5 stromal cells or E11.5 MM     | no                                         | hPSC-derived renal progenitors              | no                                                   | no               |                  |
| Integration of UB cells                     | yes, Integrated into E11.5 mouse UB on organ culture | Yes, Integrated into E11.5 mouse UB on organ culture | not shown                                  | not shown                                   | yes, Integrated into E11.5 mouse UB on organ culture | not shown        |                  |

# Full Gel images

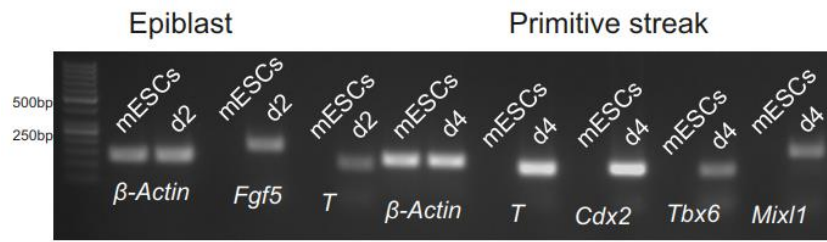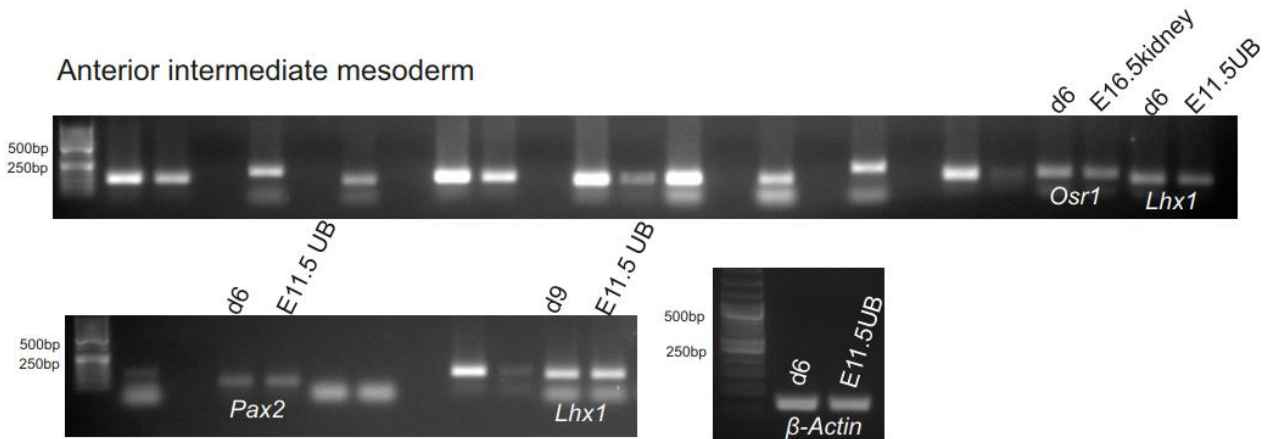

## UB-progenitor like cells

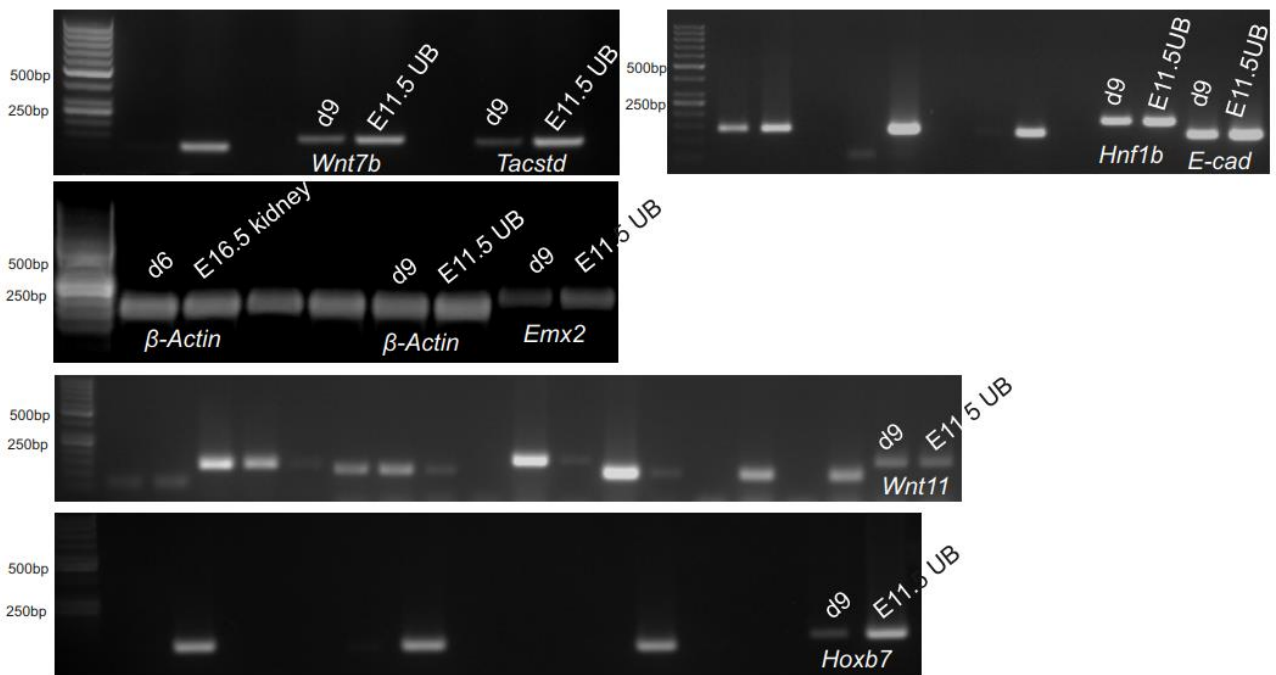

Supplement: cells-09-00329-s001.pdf [file cells-09-00329-s001.pdf]
